# Supplementary material
Source: Royal Society of Chemistry journal article supplement (doi:10.1039/d6ce00201c)
Supplement: d6ce00201c1.pdf [file d6ce00201c1.pdf]

## Supplementary Material for

### Optimizing Conditions for the Formation of Calcium Oxalate Trihydrate Using Response Surface Methodology

Nives Matijaković Mlinarić<sup>1</sup>, Arijana Hamzić<sup>2</sup>, Nikolina Filipović<sup>2</sup>, Jelena Brdarić Kosanović<sup>2</sup>, Imre Szenti<sup>3</sup>, Marija Banožić<sup>4</sup>, Anamarija Stanković<sup>2\*</sup>

Dr. Nives Matijaković Mlinarić  
Ruđer Bošković Institute  
Bijenička cesta 54  
10000 Zagreb, Croatia  
E-mail: nives.matijakovic@irb.hr (N.M.M.)  
ORCID: <https://orcid.org/0000-0002-3751-1790>

Dr. A. Stanković, Arijana Hamzić, Dr. Nikolina Filipović, Dr. Jelena Brdarić Kosanović  
Department of Chemistry, University of Osijek  
Ulica cara Hadrijana 8/A  
31000 Osijek, Croatia  
E-mail: [astankovic@kemija.unios.hr](mailto:astankovic@kemija.unios.hr) or [ster.anamarija@gmail.com](mailto:ster.anamarija@gmail.com) (A.S.);  
ORCID: <https://orcid.org/0000-0001-5090-0435>  
[arijanahamzic1@gmail.com](mailto:arijanahamzic1@gmail.com) (A.H.);  
[nfilipovic@kemija.unios.hr](mailto:nfilipovic@kemija.unios.hr) (N.F.); ORCID: <https://orcid.org/0000-0003-3127-3442>  
[jbrdaric@kemija.unios.hr](mailto:jbrdaric@kemija.unios.hr) (J.B.K.) ORCID: <https://orcid.org/0009-0008-5354-0939>

Dr. Imre Szenti  
Department of Applied and Environmental Chemistry  
University of Szeged  
Rerich Béla tér 1  
H-6720 Szeged, Hungary  
E-mail: [szentiimre@gmail.com](mailto:szentiimre@gmail.com) (I.S.)  
ORCID: <https://orcid.org/0000-0002-4602-808X>

Dr. Marija Banožić  
Faculty of Agriculture and Food Technology,  
University of Mostar, Biskupa Čule bb,  
88000 Mostar, Bosnia and Herzegovina  
E-mail: [marija.banozic@ptf.sum.ba](mailto:marija.banozic@ptf.sum.ba) (M.B.)  
ORCID: <https://orcid.org/0000-0001-6927-4964>

\*Correspondence: [ster.anamarija@gmail.com](mailto:ster.anamarija@gmail.com) or [astankovic@kemija.unios.hr](mailto:astankovic@kemija.unios.hr) (A.S.)

## Content of listed material

**Table ST1.** Experimental conditions for the precipitation systems (Runs 1–17): temperature ( $t$ ), initial pH, and calculated values of ionic strength ( $I_c$ ), saturation indices ( $S_i$ ), saturation ratios ( $S$ ), and ion activity products ( $\log IAP$ ) with respect to calcium oxalate monohydrate (COM) and trihydrate (COT).

| Run             | Temperature / °C | Ionic strength / mol dm <sup>-3</sup> | pH  | $S_i$ (COM) | $S$ (COM) | $\log IAP$ (COM) | $S_i$ (COT) | $S$ (COT) | $\log IAP$ (COT) |
|-----------------|------------------|---------------------------------------|-----|-------------|-----------|------------------|-------------|-----------|------------------|
| 1, 6, 7, 10, 16 | 36.5             | 0.05                                  | 6.5 | 2.085       | 11.028    | -6.665           | 1.653       | 6.707     | -6.667           |
| 2               | 36.5             | 0.01                                  | 5.6 | 2.234       | 13.092    | -6.516           | 1.804       | 7.980     | -6.516           |
| 3               | 36.5             | 0.10                                  | 5.6 | 1.933       | 9.258     | -6.817           | 1.500       | 5.623     | -6.820           |
| 4               | 36.5             | 0.10                                  | 7.5 | 1.938       | 9.311     | -6.812           | 1.505       | 5.656     | -6.815           |
| 5               | 48               | 0.05                                  | 5.6 | 2.071       | 10.852    | -6.679           | 1.639       | 6.599     | -6.681           |
| 8               | 48               | 0.01                                  | 6.5 | 2.236       | 13.122    | -6.514           | 1.805       | 7.989     | -6.515           |
| 9               | 25               | 0.10                                  | 6.5 | 1.954       | 9.484     | -6.796           | 1.521       | 5.761     | -6.799           |
| 11              | 48               | 0.10                                  | 6.5 | 1.922       | 9.141     | -6.828           | 1.489       | 5.553     | -6.831           |
| 12              | 48               | 0.05                                  | 7.5 | 2.076       | 10.914    | -6.674           | 1.645       | 6.645     | -6.675           |
| 13              | 25               | 0.05                                  | 7.5 | 2.095       | 11.156    | -6.655           | 1.663       | 6.784     | -6.657           |
| 14              | 36.5             | 0.01                                  | 7.5 | 2.239       | 13.167    | -6.511           | 1.809       | 8.026     | -6.511           |
| 15              | 25               | 0.01                                  | 6.5 | 2.241       | 13.198    | -6.509           | 1.811       | 8.045     | -6.509           |
| 17              | 25               | 0.05                                  | 5.6 | 2.090       | 11.092    | -6.660           | 1.659       | 6.753     | -6.661           |

**Table ST2.** IR vibration bands (in cm<sup>-1</sup>) of calcium oxalate standards COM and COT.<sup>34</sup>

| COM       | COT  | Vibrational mode                           |
|-----------|------|--------------------------------------------|
| 3483      | 3528 |                                            |
| 3429      | 3427 | $\nu(\text{OH})$                           |
| 3336      | 3222 |                                            |
| 3258      |      | $2\delta(\text{HOH})$                      |
| 3058      |      | $\nu(\text{OH})$                           |
| 1624-1622 | 1636 | $\nu_o(\text{COO}) - \nu_a(\text{CO})$     |
| 1384      |      | $\nu_s(\text{CO})$                         |
| 1368      |      |                                            |
| 1320-1316 | 1324 | $\nu_s(\text{COO})$                        |
| 958-889   |      | $L(\text{H}_2\text{O})$                    |
| 782       | 783  | $\nu_s(\text{CO}) + L(\text{H}_2\text{O})$ |
| 656       | 651  | $\delta(\text{OCO})$                       |
|           |      | $L(\text{HOH})$                            |

$\nu$  – stretching;  $\delta$  – bending;  $\alpha$ -antisymmetric;  $s$  – symmetric;  $L$  - libration.

**Table ST3.** Phase composition (wt%) of calcium oxalate hydrates and corresponding Rietveld refinement indicators ( $R_e$ ,  $R_p$ ,  $R_{wp}$ , GoF) for each experimental Run.

| Run | Phase composition<br>(wt %) |      | $R_e$ (%) | $R_p$ (%) | $R_{wp}$ (%) | GoF    |
|-----|-----------------------------|------|-----------|-----------|--------------|--------|
|     | COT                         | COM  |           |           |              |        |
| 1   | 100                         | 0    | 3.891     | 9.020     | 11.991       | 9.498  |
| 2   | 44.6                        | 55.4 | 4.117     | 8.298     | 11.855       | 8.291  |
| 3   | 41.2                        | 58.8 | 4.344     | 5.566     | 7.490        | 2.966  |
| 4   | 100                         | 0    | 4.481     | 8.611     | 14.311       | 10.198 |
| 5   | 0                           | 100  | 4.313     | 6.627     | 9.290        | 4.640  |
| 6   | 99.4                        | 0.6  | 3.957     | 8.586     | 12.712       | 10.318 |
| 7   | 100                         | 0    | 4.230     | 10.298    | 15.670       | 13.723 |
| 8   | 0                           | 100  | 4.316     | 7.244     | 10.346       | 5.746  |
| 9   | 100                         | 0    | 4.128     | 8.823     | 12.524       | 9.203  |
| 10  | 100                         | 0    | 4.352     | 8.779     | 11.765       | 9.657  |
| 11  | 0                           | 100  | 4.190     | 7.763     | 10.991       | 6.879  |
| 12  | 0                           | 100  | 4.351     | 6.878     | 9.983        | 5.266  |
| 13  | 100                         | 0    | 3.966     | 9.575     | 13.336       | 11.308 |
| 14  | 99.8                        | 0.2  | 4.210     | 10.799    | 16.545       | 15.448 |
| 15  | 98.8                        | 0.2  | 4.060     | 11.792    | 16.721       | 16.965 |
| 16  | 100                         | 0    | 3.879     | 10.166    | 15.789       | 15.998 |
| 17  | 100                         | 0    | 4.053     | 10.280    | 14.771       | 13.284 |

**Figure SF1.** Light microscope images of all precipitated samples. Note the difference in magnification scale (Runs 1, 2, 3, 4, 6, 7, 9, 10, 15, 16, and 17 at 10×; Runs 5, 8, 11, 12, 13, and 14 at 40×).

**Figure SF1**

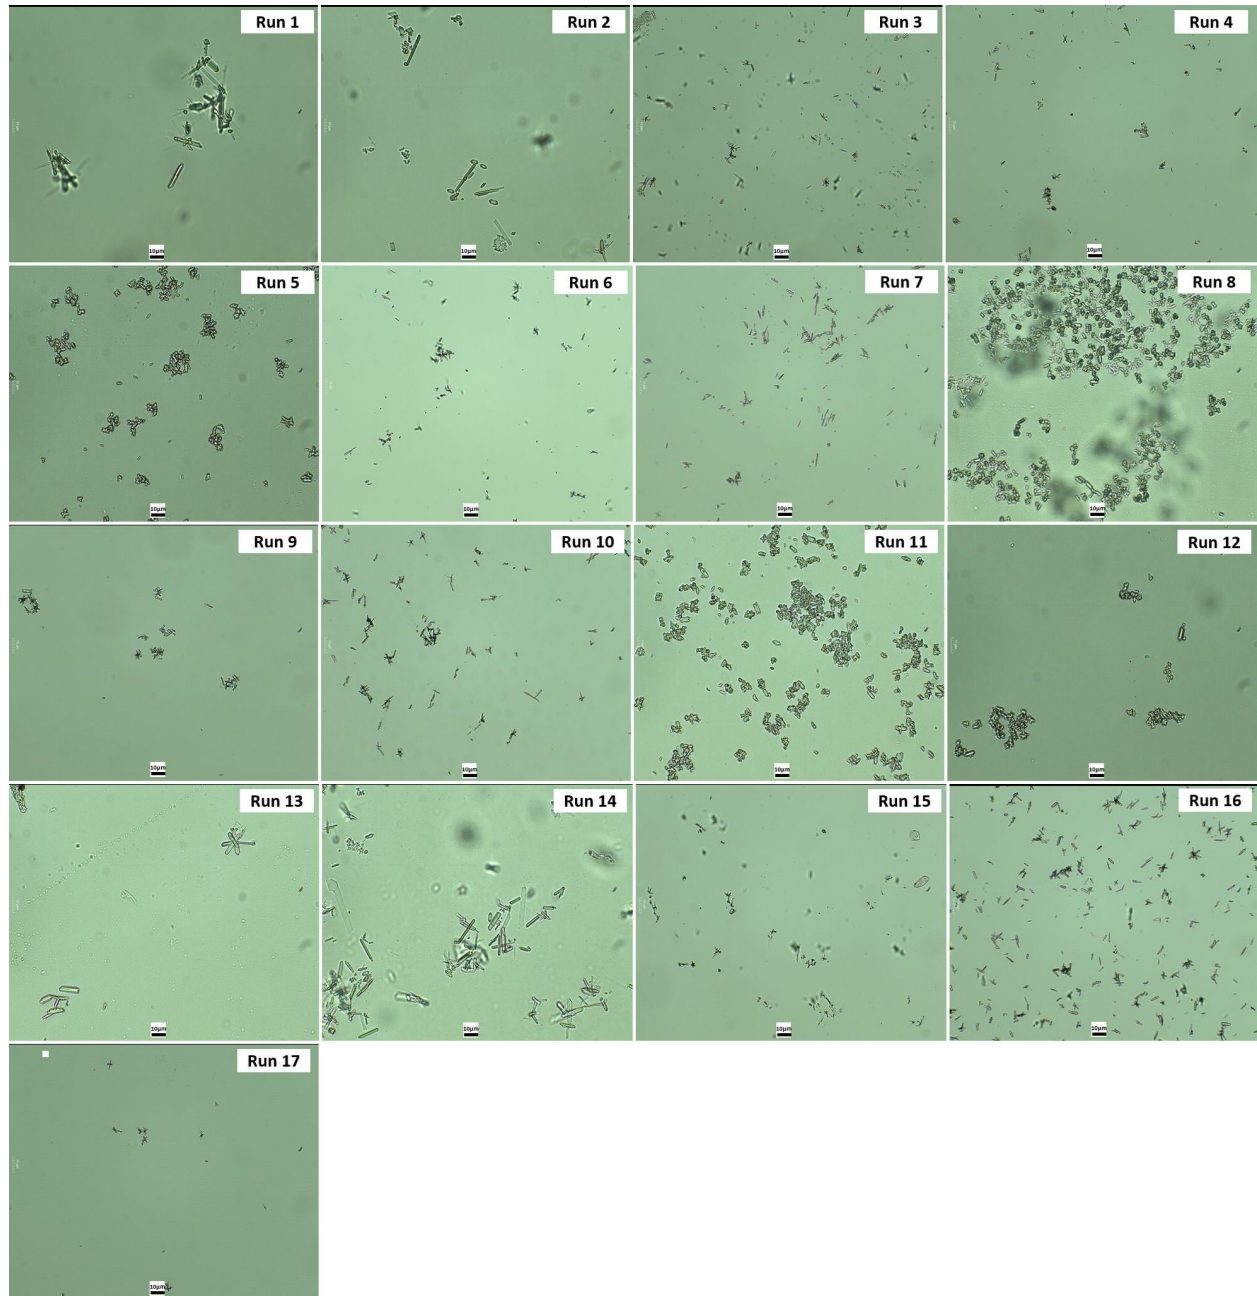

**Table ST4.** ANOVA for the response surface quadratic models for the COT and COM

| Source                | Sum of squares | Degree of freedom | Mean square | F-value | p-value  |
|-----------------------|----------------|-------------------|-------------|---------|----------|
| <b><i>COT (%)</i></b> |                |                   |             |         |          |
| <i>The recovery</i>   |                |                   |             |         |          |
| Model                 | 28213.42       | 6                 | 4702.24     | 24.88   | < 0.0001 |
| Residual              | 1889.90        | 10                | 188.99      |         |          |
| Lack of fit           | 1630.70        | 6                 | 271.78      | 4.19    | 0.0933   |
| Pure error            | 259.20         | 4                 | 64.80       |         |          |
| Total                 | 30103.32       | 16                |             |         |          |
| $R^2$                 | 0.9372         |                   |             |         |          |
| <b><i>COM (%)</i></b> |                |                   |             |         |          |
| <i>The recovery</i>   |                |                   |             |         |          |
| Model                 | 28443.88       | 6                 | 4740.65     | 26.20   | < 0.0001 |
| Residual              | 1809.20        | 8                 | 0.018       |         |          |
| Lack of fit           | 1629.20        | 4                 | 0.022       | 1.60    | 0.3299   |
| Pure error            | 180.00         | 4                 | 0.014       |         |          |
| Total                 | 30253.08       | 12                |             |         |          |
| $R^2$                 | 0.9402         |                   |             |         |          |

**Table ST5.** The regression coefficient of a polynomial function of all response surfaces

| Term                                                                                                             | Coefficients | Standard error | F-value | p-value  |
|------------------------------------------------------------------------------------------------------------------|--------------|----------------|---------|----------|
| <i>COT</i>                                                                                                       |              |                |         |          |
| Intercept                                                                                                        | 96.4         | 6.15           |         |          |
| $X_1$                                                                                                            | -49.85       | 4.86           | 105.19  | < 0.0001 |
| $X_2$                                                                                                            | 14.25        | 4.86           | 8.60    | 0.0150   |
| $X_3$                                                                                                            | -0.2500      | 4.86           | 0.0026  | 0.9600   |
| $X_1^2$                                                                                                          | -34.05       | 6.70           | 25.83   | 0.0005   |
| $X_2^2$                                                                                                          | -12.35       | 6.70           | 3.40    | 0.0951   |
| $X_3^2$                                                                                                          | -12.65       | 6.70           | 3.57    | 0.0883   |
| <i>COM</i>                                                                                                       |              |                |         |          |
| Intercept                                                                                                        | 3.00         | 6.02           |         |          |
| $X_1$                                                                                                            | 49.97        | 4.76           | 110.44  | < 0.0001 |
| $X_2$                                                                                                            | -14.25       | 4.76           | 8.98    | 0.0134   |
| $X_3$                                                                                                            | 0.3750       | 4.76           | 0.0062  | 0.9387   |
| $X_1^2$                                                                                                          | 34.22        | 6.56           | 27.26   | 0.0004   |
| $X_2^2$                                                                                                          | 12.77        | 6.56           | 3.80    | 0.0799   |
| $X_3^2$                                                                                                          | 12.83        | 6.56           | 3.83    | 0.0789   |
| $Y = \beta_0 + \beta_1 X_1 + \beta_2 X_2 + \beta_3 X_3 + \beta_{11} X_1^2 + \beta_{22} X_2^2 + \beta_{33} X_3^2$ |              |                |         |          |
| $X_1$ : temperature; $X_2$ : pH $X_3$ : ionic strength *Significant at $p \leq 0.05$                             |              |                |         |          |

**Figure SF2.** One-factor graph; effect of each parameter including temperature, pH and ionic strength on the a) COT content and b) COM content

**Figure SF2**

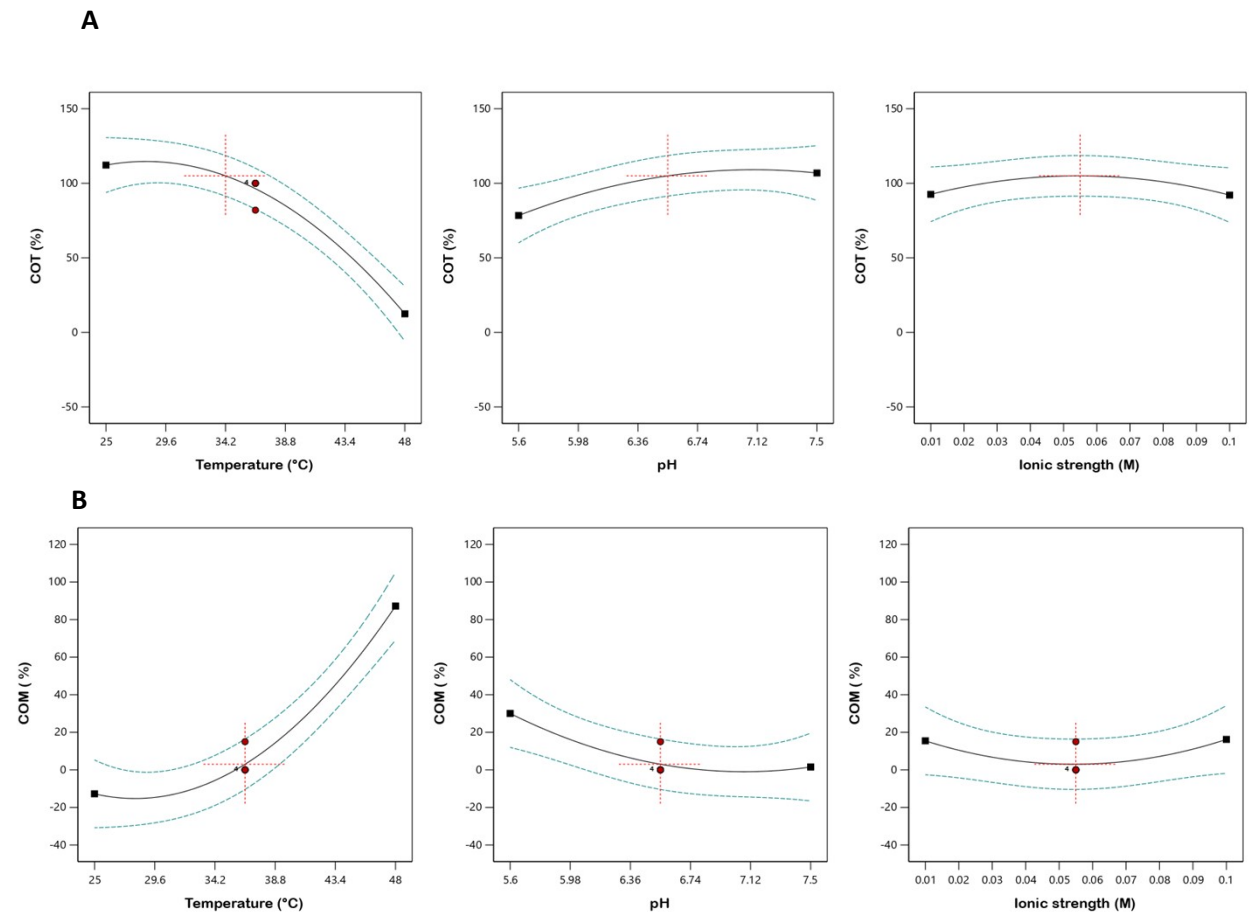

**Figure SF3.** XRD pattern and its Rietveld refinement of the optimized sample for COT. Rietveld output plot (Black line represents experimental plot, red line calculated plot, black points represent Bragg positions, while blue line represents difference plot).

**Figure SF3**

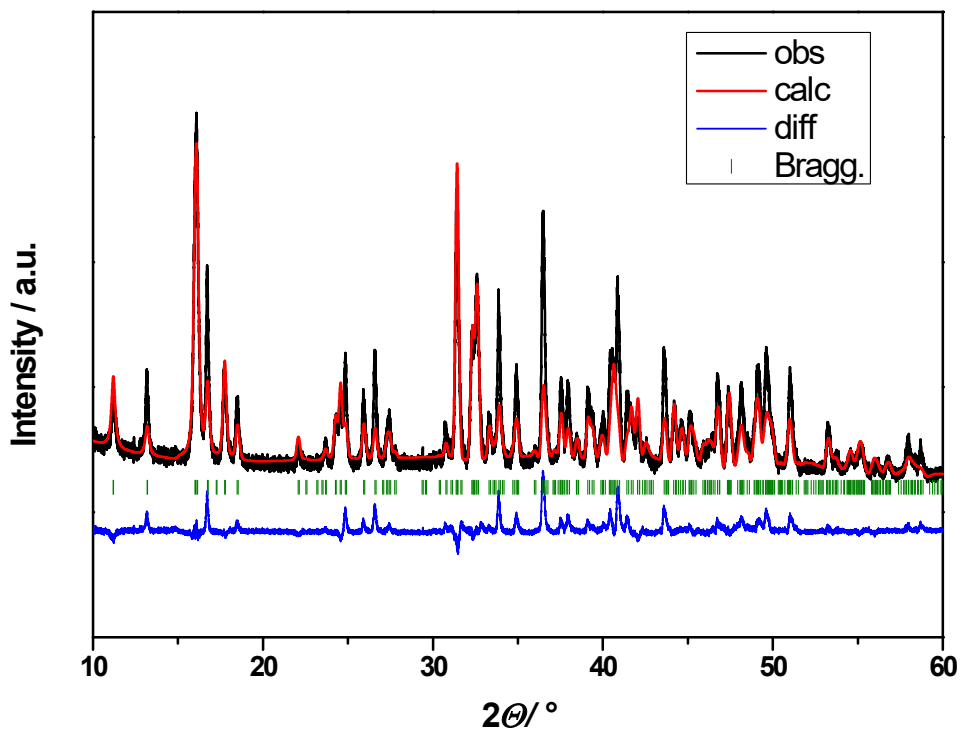

**Table ST6.** Crystallographic data obtained from Rietveld refinement for the synthesized optimized COT sample.

|                          |                 |                 |                 |
|--------------------------|-----------------|-----------------|-----------------|
| Phase composition (wt %) | 100 %           |                 |                 |
| Unit cell parameters (Å) | $a = 6.1034(4)$ | $b = 7.1566(6)$ | $c = 8.4457(6)$ |
| $R_B$ (%)                | 14.27695        |                 |                 |
| $R_p$ (%)                | 12.72697        |                 |                 |
| $R_{wp}$ (%)             | 17.23697        |                 |                 |
| $R_e$ (%)                | 5.84193         |                 |                 |
| GoF                      | 8.70581         |                 |                 |
